# Supplementary material for: Ultrathin polydopamine film coated gold nanoparticles: a sensitive, uniform, and stable SHINERS substrate for detection of benzotriazole
Source: Royal Society of Chemistry journal article supplement (doi:10.1039/c7an00675f), 2017-01-01
Supplement: c7an00675f1.pdf [file c7an00675f1.pdf]

## **Supporting Information**

### **Ultrathin polydopamine film coated gold nanoparticles: A sensitive, uniform, and stable SHINERS substrate for detection of benzotriazole**

Weichun Ye <sup>a,b,\*</sup>, Hong Huang <sup>a</sup>, Weiwei Yang <sup>a</sup>, Xiang Wang <sup>b</sup>, Cuiling Ren <sup>a</sup>, Qiushi Hu <sup>a</sup>,  
Yumin Li <sup>c,\*</sup> and Bin Ren <sup>b,\*</sup>

<sup>a</sup> State Key Laboratory of Applied Organic Chemistry and Department of Chemistry, Lanzhou University, Lanzhou 730000, China

<sup>b</sup> State Key Laboratory for Physical Chemistry of Solid Surfaces, The MOE Key Laboratory for Spectrochemical Analysis and Instrumentation, iChEM and Department of Chemistry, College of Chemistry and Chemical Engineering, Xiamen University, Xiamen 361005, China

<sup>c</sup> Key Laboratory of Digestive System Tumors, Gansu Province, 730030, China

E-mail: yewch@lzu.edu.cn (W. Ye); liym@lzu.edu.cn (Y. Li); bren@xmu.edu.cn (B. Ren)

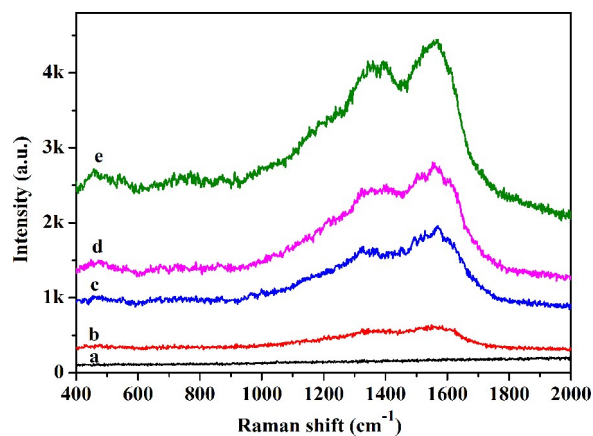

**Fig. S1** Raman signals of Au@PDA substrate with different thickness: (a) uncoated, (b) 1.3 nm, (c) 2.3 nm, (d) 4.5 nm, and (e) 8.5 nm. The power was 0.15 mW and the integration time was 10 s.

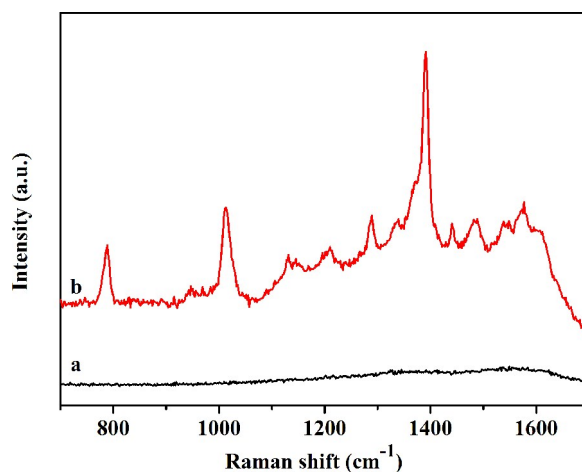

**Fig. S2** Raman spectra from the Au@PDA substrate (a) and  $10^{-6}$  M BTA adsorbed on the substrate (b) obtained under the same detection conditions (the power of 0.15 mW and the integration time of 10 s).

## EF calculation

The enhancement factor of SERS can be calculated as the following formula <sup>1</sup>:

$$EF = \left( \frac{I_{SERS}}{I_{norm}} \right) \left( \frac{N_{bulk}}{N_{surf}} \right)$$

Here,  $I_{SERS}$ ,  $I_{norm}$ ,  $N_{bulk}$ , and  $N_{surf}$  are the measured SERS intensity for a monolayer of scatters, the measured intensity of nonenhanced or normal Raman scattering from a bulk sample, the number of molecules under laser illumination for the bulk sample, and the number of molecules in the SAM, respectively.

$I_{SERS}$  and  $I_{norm}$  can be directly measured from the Raman spectra. For example, we can select the peak intensity of  $1075 \text{ cm}^{-1}$  as the identification position for 4-MBA. For the values of  $N_{bulk}$  and  $N_{surf}$ , they may be calculated on the basis of the estimate of the concentration of surface species or bulk sample and the corresponding sampling areas. Generally, assuming a molecular area of  $0.22 \text{ nm}^2/\text{molecule}$  for a thiol footprint in the SAM, the surface concentration of the SAM on a SERS substrate equals to  $7.6 \times 10^{-10} \text{ mol/cm}^2$ . AS for a focused laser beam, its diameter and penetration depth of the laser spot are about  $1$  and  $9 \text{ }\mu\text{m}$ , respectively. Therefore, the  $N_{surf}$  value can be calculated to be  $5.9 \times 10^{-18} \text{ mol}$ . On the basis of the density of bulk 4-MBA ( $\sim 1.22 \text{ g/cm}^3$ ), the  $N_{bulk}$  value can be calculated to be  $3.2 \times 10^{-14} \text{ mol}$  for 4-MBA.

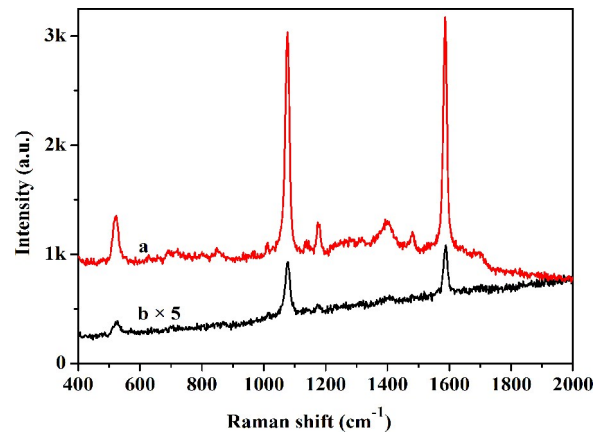

**Fig. S3** (a) SERS spectrum of a monolayer of 4-MBA adsorbed on Au@PDA (1.3 nm). (b) Normal Raman spectrum of pure 4-MBA powder. The laser power is 15  $\mu$ W and the integration time is 10 s.

### References

- 1 W.B. Cai, B. Ren, X. Q. Li, C. X. She, F. M. Liu, X. W. Cai and Z. Q. Tian, *Surf. Sci.* 1998, **406**, 9-22.
